# Supplementary material
Source: publisher site journal article supplement (https://www.dovepress.com/article/496650)

**Supplementary Table 1. Patients basic information**

| ***No of Patient*** | ***Age(years)*** | ***Sex*** | ***Diagnosis*** | ***Group*** | ***Sample source*** |
| --- | --- | --- | --- | --- | --- |
| 1 | 56 | male | tibiofibular fracture | NG | inside of middle shank |
| 2 | 29 | male | tibiofibular fracture | NG | inside of middle shank |
| 3 | 31 | male | tibiofibular fracture | NG | inside of middle shank |
| 4 | 70 | male | donator | CG | inside of middle shank |
| 5 | 45 | male | donator | CG | inside of middle shank |
| 6 | 41 | male | donator | CG | inside of middle shank |
| 7 | 51 | male | donator | CG | inside of middle shank |

NG=[necrotizing fasciitis](javascript:;) group; CG=control group

**Supplementary Table 2. Proportion and marker genes of all cell clusters or subclusters in two groups.**

| ***Clusters*** | ***CG*** | ***NG*** | ***P value*** |
| --- | --- | --- | --- |
| B cell | 0.32% | 1.97% | ＜0.0001 |
| Cycling cell | 0.13% | 5.01% | ＜0.0001 |
| Endothelial | 17.36% | 14.25% | ＜0.0001 |
| Fibroblast | 57.13% | 21.30% | ＜0.0001 |
| Mast cell | 2.05% | 0.42% | ＜0.0001 |
| Myeloid | 4.11% | 20.96% | ＜0.0001 |
| SMC | 14.45% | 28.42% | ＜0.0001 |
| T cell | 4.46% | 7.67% | ＜0.0001 |
| ***Fibroblast subclusters*** | | | |
| Antigen-presenting Fib | 0.77% | 1.97% | ＜0.0001 |
| Inflammatory Fib | 26.40% | 24.99% | 0.061 |
| Matrix Fib | 48.54% | 29.56% | ＜0.0001 |
| Mesenchymal Fib | 19.50% | 25.55% | ＜0.0001 |
| MyoFib | 4.79% | 17.93% | ＜0.0001 |
| ***Myeloid cell subclusters*** | | | |
| SPP1+ M0 | 1.63% | 6.03% | ＜0.0001 |
| IL1B+ M1 | 15.81% | 27.78% | ＜0.0001 |
| C1QA+ M2 | 46.74% | 36.20% | ＜0.0001 |
| IFN-act M2 | 1.63% | 0.85% | 0.013 |
| SPP1+ M2 | 0.75% | 6.75% | ＜0.0001 |
| Monocyte | 2.71% | 13.93% | ＜0.0001 |
| cDC1 | 1.63% | 1.08% | 0.099 |
| cDC2 | 18.05% | 3.48% | ＜0.0001 |
| Other | 11.06% | 3.93% | ＜0.0001 |
| ***T cell subclusters*** | | | |
| Cytotoxic CD8 T | 25.94% | 15.98% | ＜0.0001 |
| GZMK+ CD4 Teff | 50.75% | 61.41% | ＜0.0001 |
| GZMK+ CD8 Teff | 9.31% | 7.58% | 0.086 |
| ILC3 | 3.06% | 3.07% | 0.986 |
| NK | 2.13% | 1.91% | 0.677 |
| NKT | 7.75% | 2.87% | ＜0.0001 |
| Other | 1.06% | 7.17% | ＜0.0001 |

Supplementary Figure.1 Gene Ontology (GO) terms of fibroblast (Fib) subtypes.


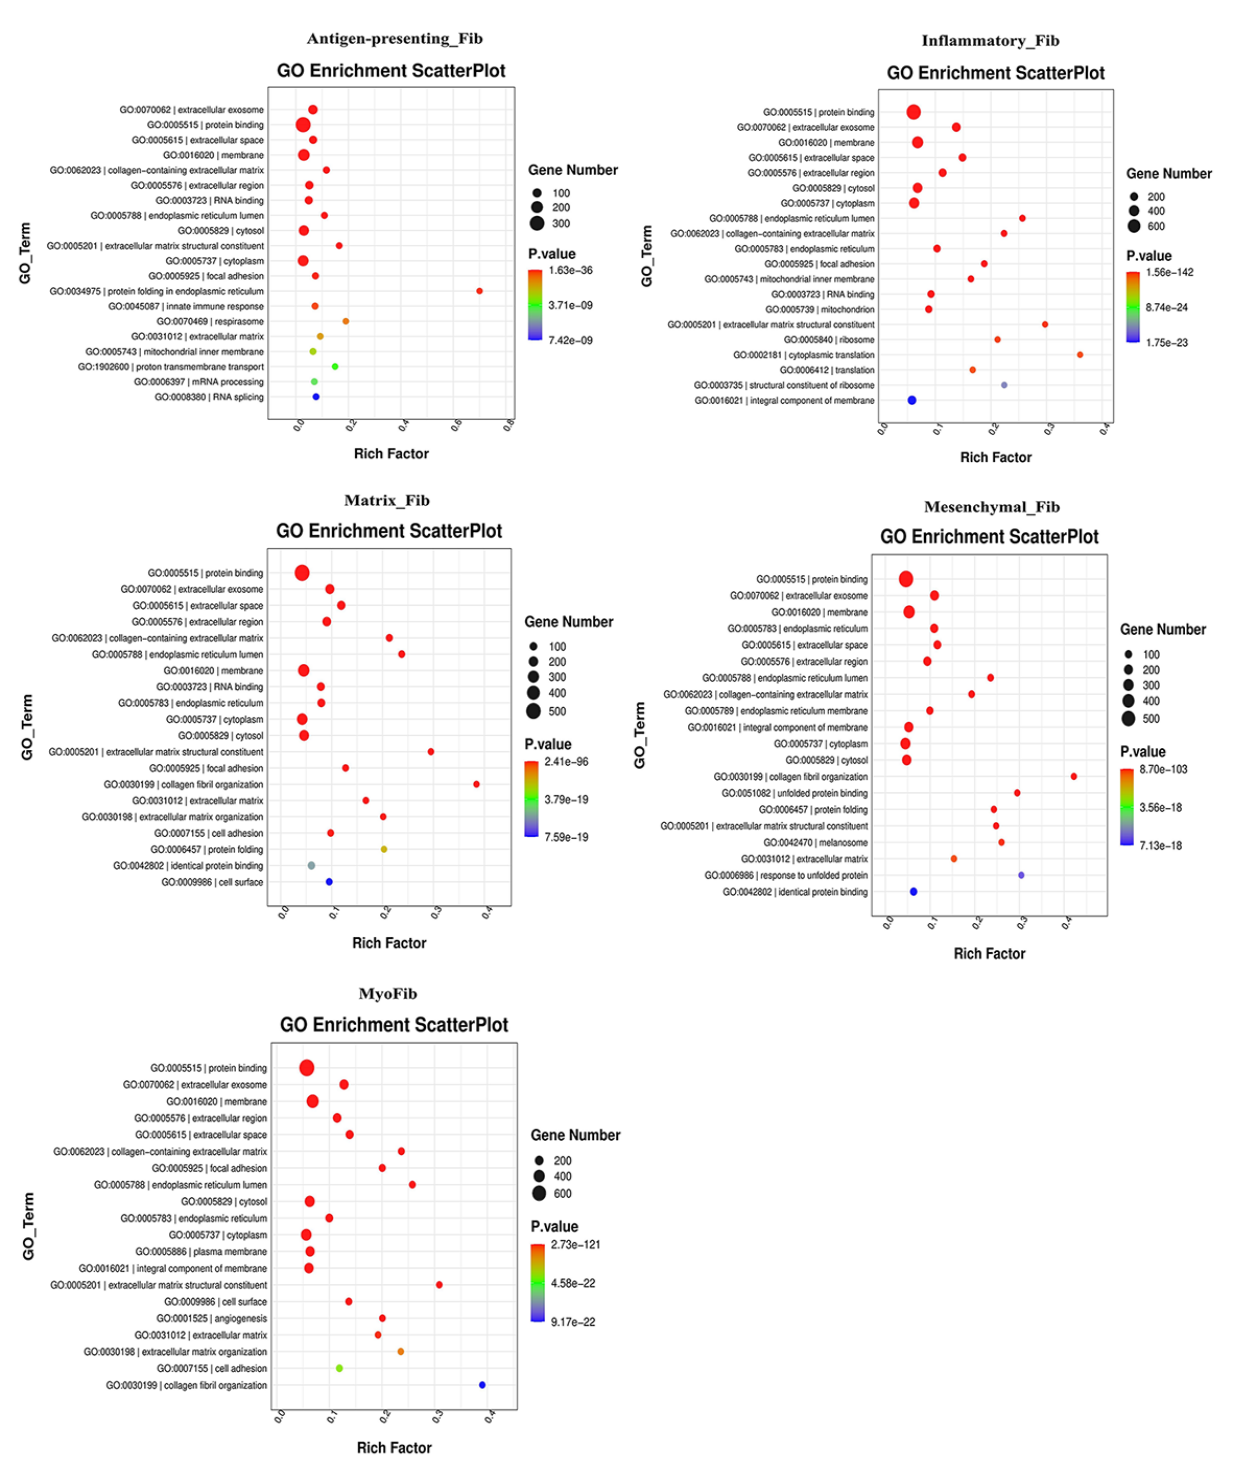


Supplementary Figure.2 Kyoto Encyclopedia of Genes and Genomes (KEGG) pathways of fibroblast (Fib) subtypes.


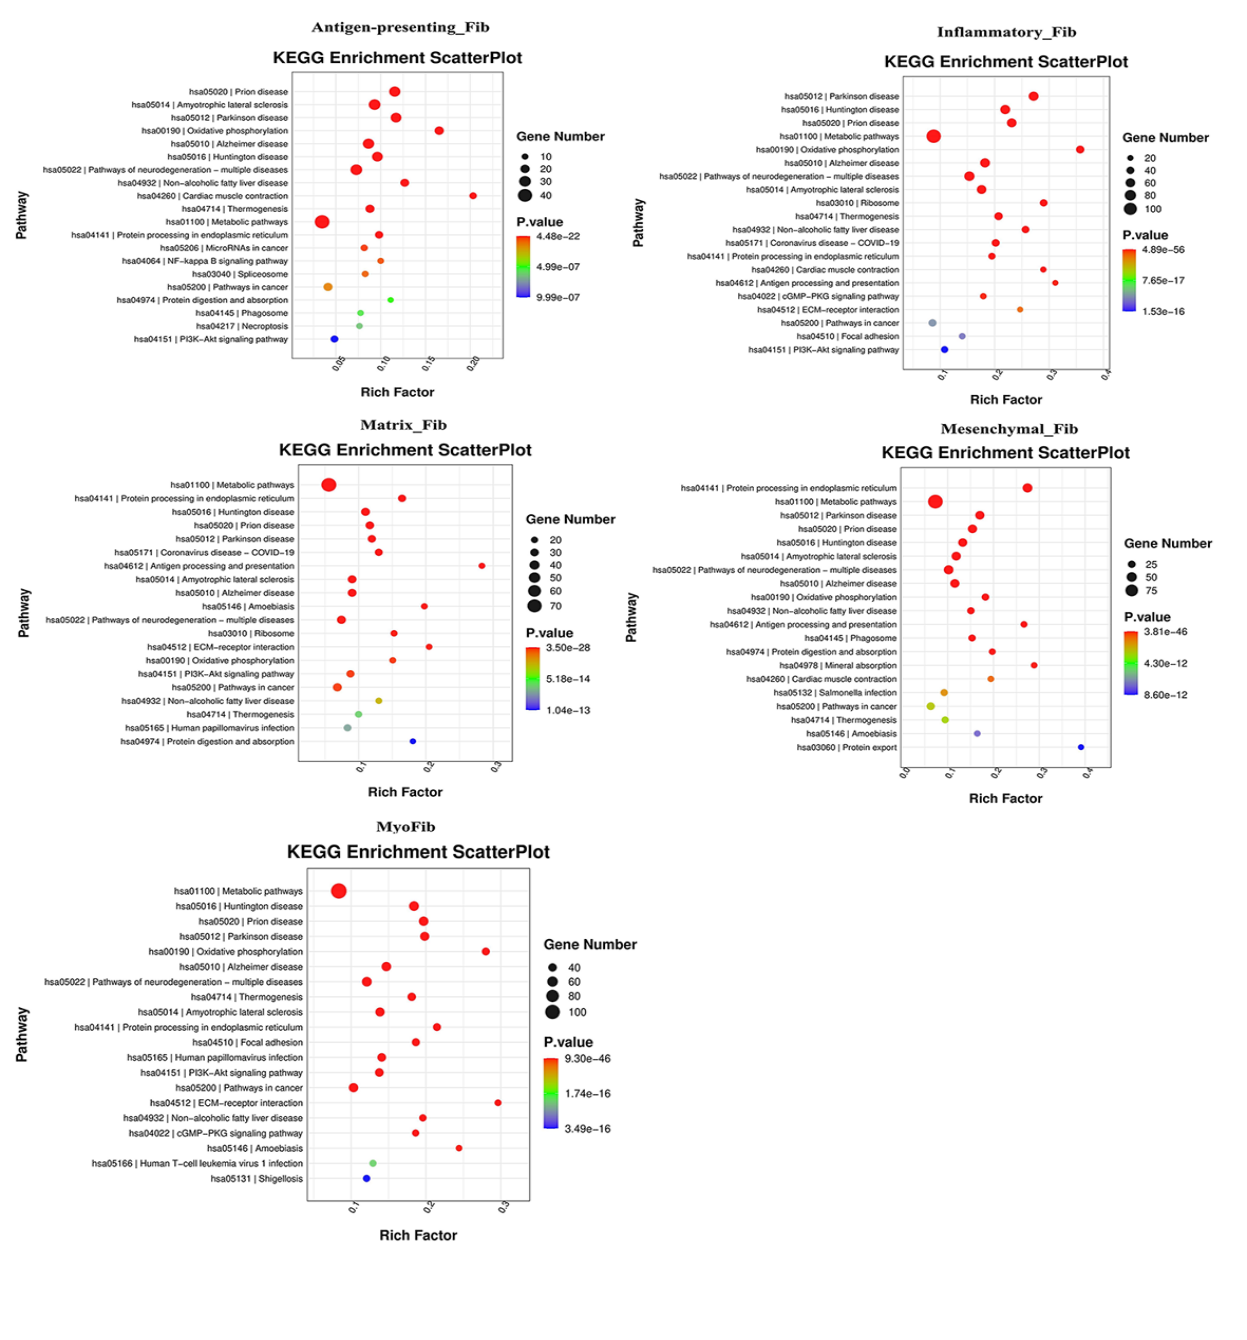


Supplementary Figure.3 Gene Ontology (GO) terms of macrophage (Mac) subtypes.


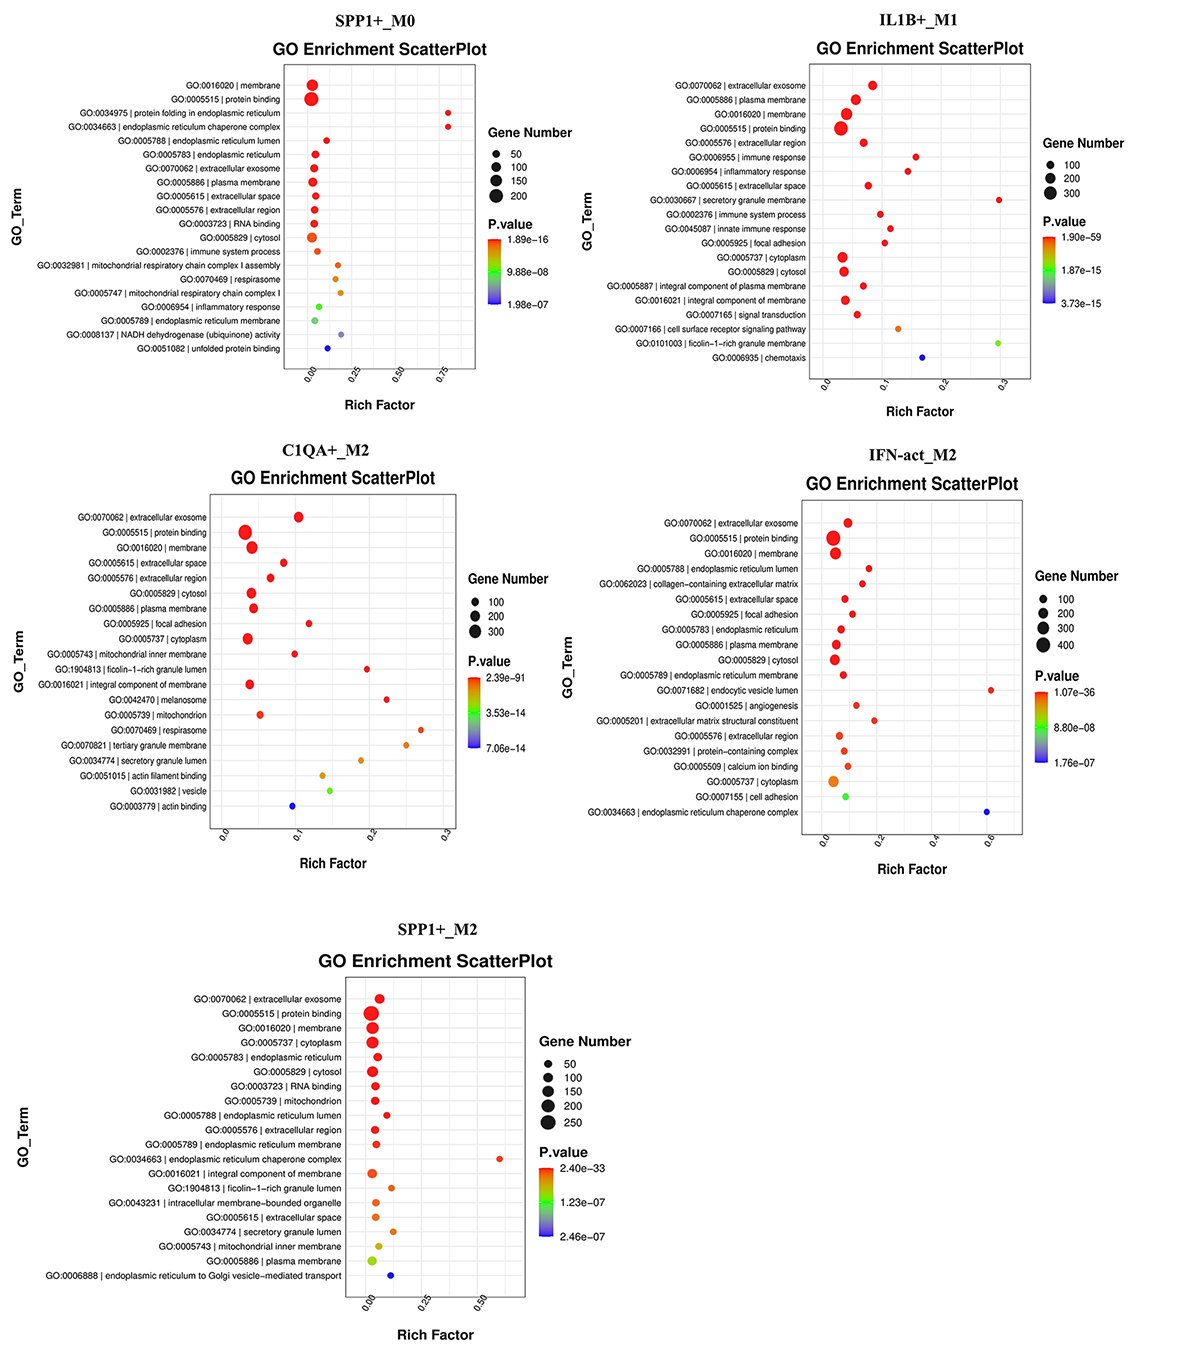


Supplementary Figure.4. Kyoto Encyclopedia of Genes and Genomes (KEGG) pathways of macrophage (Mac) subtypes.


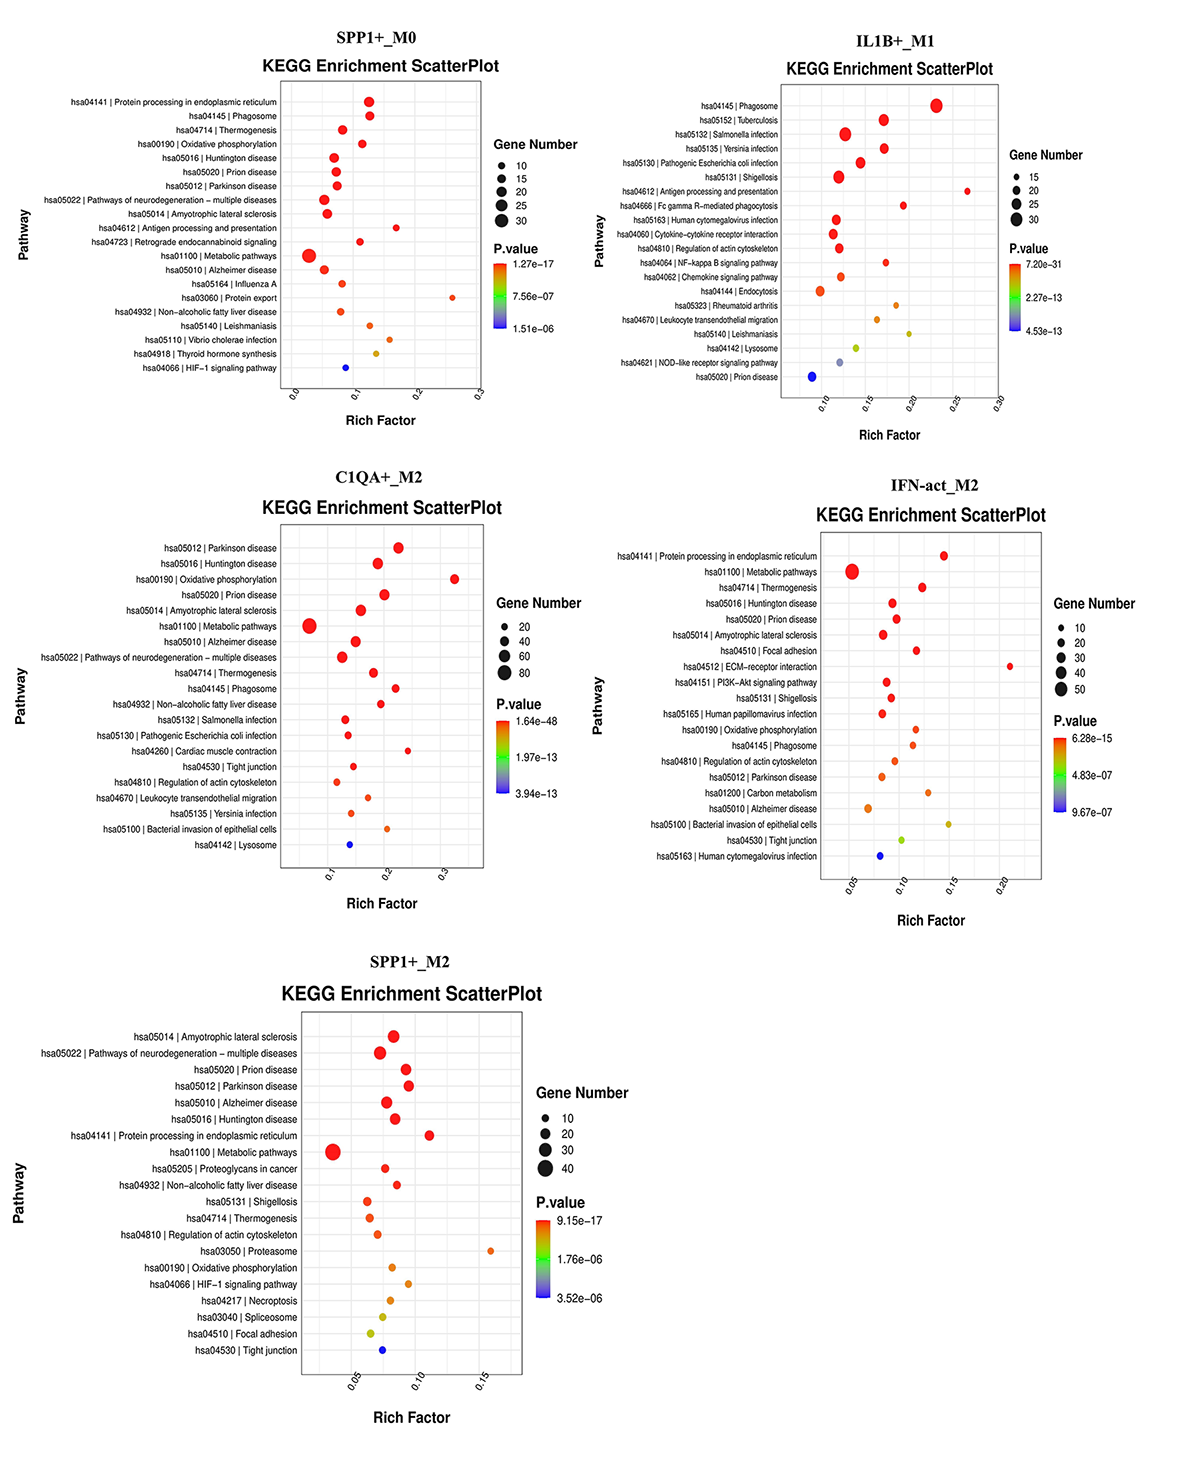


Supplementary Figure.5 Gene Ontology (GO) terms of T cell subtypes. (Teff=effector T cell; ILC=innate lymphoid cells; NKT=nature killer T cell)


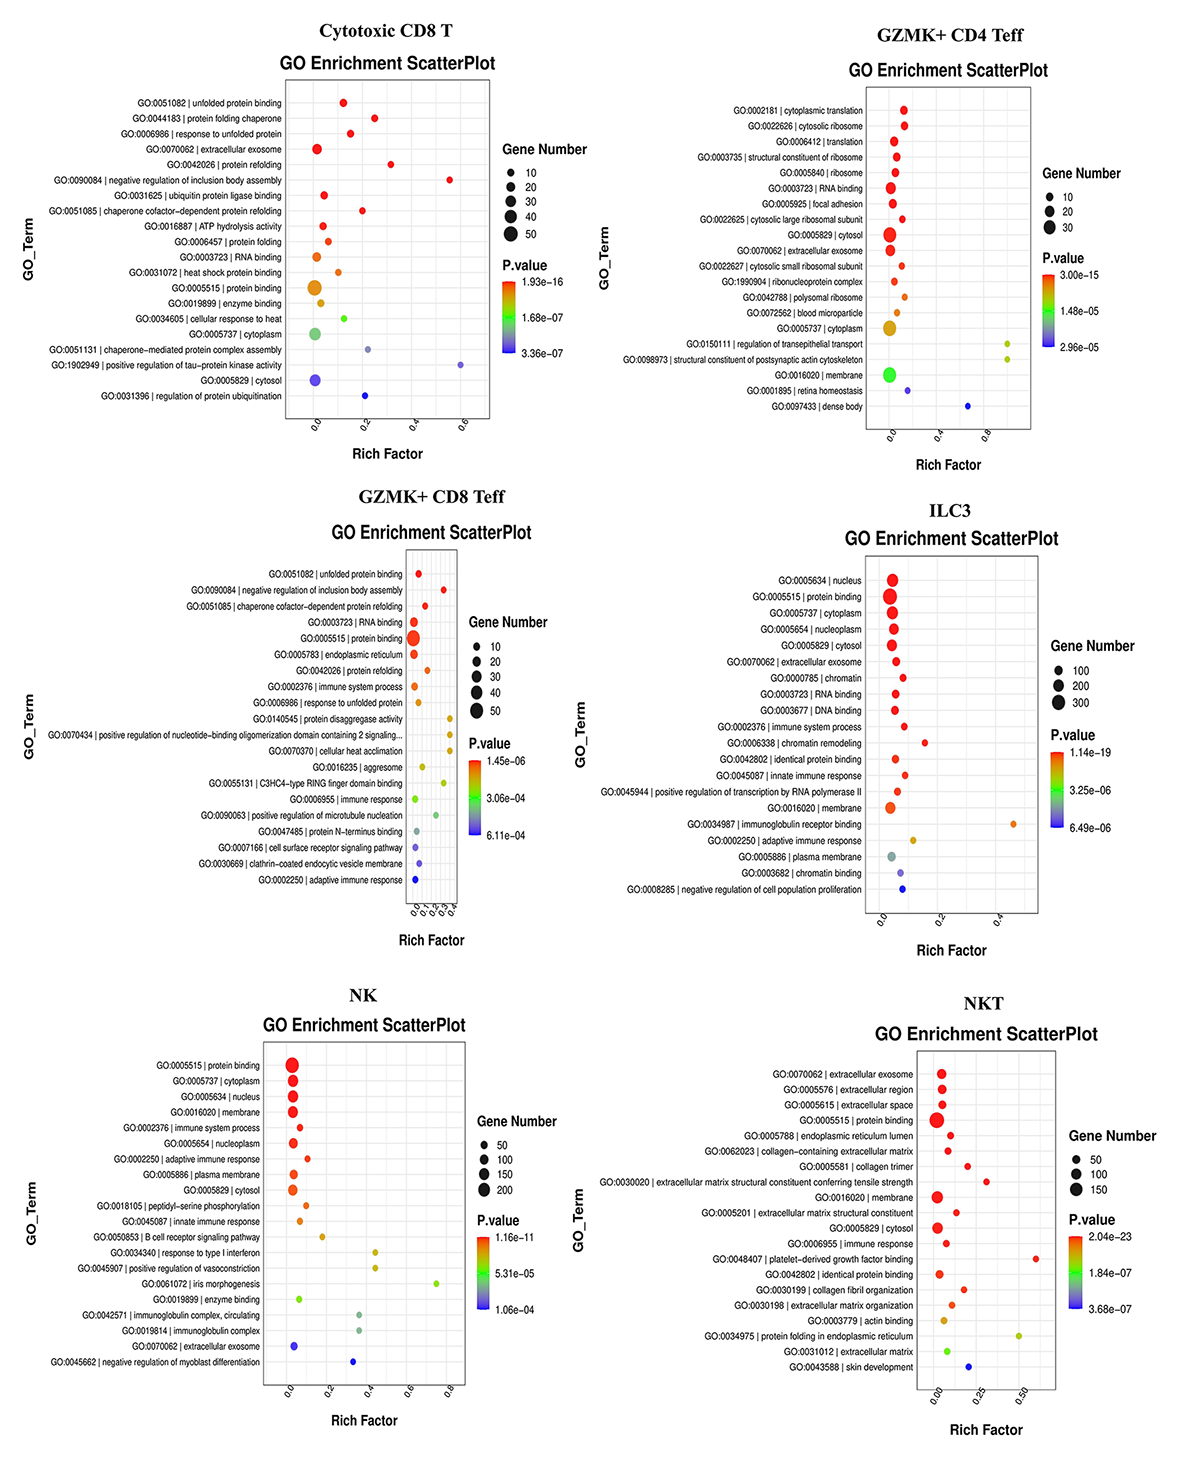


Supplementary Figure.6 Kyoto Encyclopedia of Genes and Genomes (KEGG) pathways of T cell subtypes. (Teff=effector T cell; ILC=innate lymphoid cells; NKT=nature killer T cell)


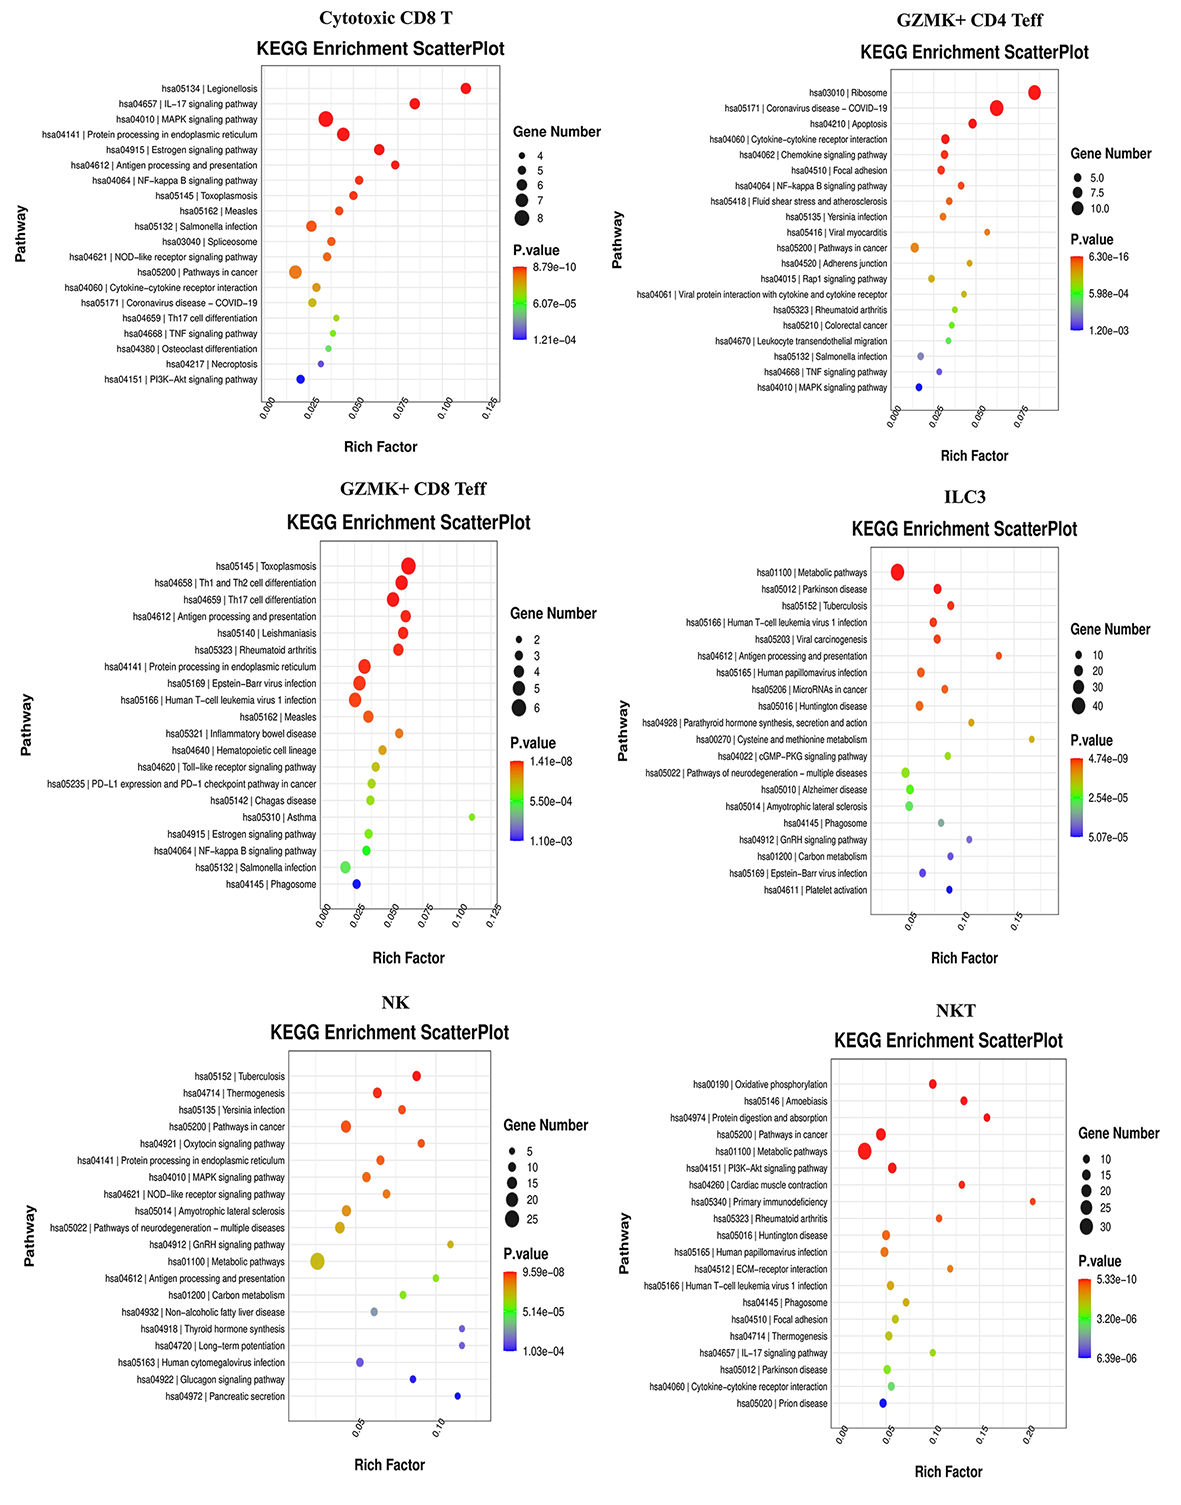

Supplement: Supplementary file 1 [file get_supplementary_file.php]
